# Supplementary material for: Targeting the Lysosomal Degradation of Rab22a‐NeoF1 Fusion Protein for Osteosarcoma Lung Metastasis
Source: PubMed Central journal article supplement (PMC9929137; doi:10.1002/advs.202205483), 2022-12-18
Supplement: ADVS-10-2205483-s001.pdf [file ADVS-10-2205483-s001.pdf]

## Supporting Information

for *Adv. Sci.*, DOI 10.1002/adv.202205483

Targeting the Lysosomal Degradation of Rab22a-NeoF1 Fusion Protein for Osteosarcoma Lung Metastasis

*Cuiling Zeng, Li Zhong, Wenqiang Liu, Yu Zhang, Xinhao Yu, Xin Wang, Ruhua Zhang, Tiebang Kang\* and Dan Liao\**

Table 2

| SiRNA      | Target               |
|------------|----------------------|
| TRIM40_001 | CCACAGAAATTAGAGGTTA  |
| TRIM40_002 | CGGCCAGAATCCTTGACAT  |
| TRIM40_003 | GGACGGCCAAGGAATTAGA  |
| FBXL12_001 | CCAAGCTCAGAGTCCTTGA  |
| FBXL12_002 | TCCGAGATGTGCGCAAGAT  |
| FBXL12_003 | TGCAGGAGCTCAGCTATCT  |
| USP7_001   | GAATGACATGTACGATGAA  |
| USP7_002   | GAGCGACCTTACCCAAGTT  |
| USP7_003   | TAAGGACCCTGCAAATTAT  |
| PJA2_001   | GCAGGAGGGTATCAGACAA  |
| PJA2_002   | GAACAATGCTGTCCAATCT  |
| PJA2_003   | GTTAGATTCTGTACCATTA  |
| UBR2_001   | GGCGTAGGTCTGTTTCGATA |
| UBR2_002   | GGTTCACACCTATGAACAA  |
| UBR2_003   | GCCACTCAAAGTTCAAGTT  |
| STUB1_001  | CTGTGAAGGCGCACTTCTT  |
| STUB1_002  | GCTCTTCGAATCGCGAAGA  |
| STUB1_003  | AGCGCTGGAACAGCATTGA  |
| ALG13_001  | GGTCATCTCTTCTATTGTA  |
| ALG13_002  | GGAAGTGGCAAAGCAGCTA  |
| ALG13_003  | GGGTCATCTCTTCTATTGT  |
| PINK1_001  | GGACGCTGTTCCCTCGTTAT |
| PINK1_002  | CCAACAGGCTCACAGAGAA  |
| PINK1_003  | GGCTGGTGATCGCAGATTT  |
| FLT3_001   | GGACTCGGATCAAATCTCA  |
| FLT3_002   | GAAGGCATCTACACCATTA  |
| FLT3_003   | GAATGTGCTTACATTTGAA  |
| EGFR_001   | GAGGAAATATGTACTACGA  |
| EGFR_002   | GGAGCGAATTCCTTTGGAA  |
| EGFR_003   | GCAGAGGAATTATGATCTT  |
| P62_001    | GGAGTCGGATAACTGTTCA  |
| P62_002    | TGAGGAAGATCGCCTTGGA  |
| P62_003    | GGACCCATCTGTCTTCAAA  |
| OPTN_001   | GGCTTACCTTGTTCAAAGA  |
| OPTN_002   | GAGCTTGTTTATACTAACA  |
| OPTN_003   | CCAAGAATTACTTCGAACA  |
| NBR1_001   | GGAGTGGATTTACCAGTTA  |
| NBR1_002   | GGTGCAGTATCATAGTAGA  |
| NBR1_003   | GAGCCCTGATAACATTGAA  |
| NDP52_001  | GAGCAAGTATTCCTTTCCA  |
| NDP52_002  | GAAGCAGAATGAACTACT   |

|             |                      |
|-------------|----------------------|
| NDP52_003   | GCAGATTGCTCAGTTACAT  |
| C-CBL_001   | CTACCAGCATCTCCGTA    |
| C-CBL_002   | GAGCTTTTCGACAGGCTCTA |
| C-CBL_003   | TCGGATTACTAAAGCAGAT  |
| BNIP3L_001  | GAATCAGGACAGAGTAGTT  |
| BNIP3L_002  | GGAAAAGTGGAGCCATGAA  |
| BNIP3L_003  | CAGACACCCTAAACGTTCT  |
| STBD1_001   | GCCGGAGCACTTTTCGTTT  |
| STBD1_002   | GGAGCTGGTCACCAAACCA  |
| STBD1_003   | TCCGGGAGGCCATCAGAGT  |
| NIX_001     | GAATCAGGACAGAGTAGTT  |
| NIX_002     | GGAAAAGTGGAGCCATGAA  |
| TOLLIP_001  | GCATGATCAACCTCGTCAT  |
| TOLLIP_002  | TGGTCCTGATGCCAACAGT  |
| TOLLIP_003  | GCGTGGACTCTTTCTATCT  |
| TAX1BP1_001 | CCTCTACTGTAGATGTAAA  |
| TAX1BP1_002 | CAGTGATGCTGTCAACGTA  |
| TAX1BP1_003 | GGAACACGAACTAAGAAGA  |
| FUNDC1_001  | GCAGCACCTGAAATCAACA  |
| FUNDC1_002  | CAAGCAGAACATTGTGATA  |
| FUNDC1_003  | GTAGCTACCCAGATTGTAA  |
| FAM134B_001 | GCAGAATCATGGATGAATT  |
| FAM134B_002 | CCACTGAGCTCAAGAGAAA  |
| FAM134B_003 | TCAGCATATTTCTTCAAGA  |
| NCOA4_001   | AGATGAGATGGACCTATCA  |
| NCOA4_002   | GGCTCATGCTAGTTCAGCA  |

---
