# Supplementary material for: Targeting the Lysosomal Degradation of Rab22a‐NeoF1 Fusion Protein for Osteosarcoma Lung Metastasis
Source: PubMed Central journal article supplement (PMC9929137; doi:10.1002/advs.202205483), 2022-12-18
Supplement: ADVS-10-2205483-s003.pdf [file ADVS-10-2205483-s003.pdf]

## Supporting Information

for *Adv. Sci.*, DOI 10.1002/adv.202205483

Targeting the Lysosomal Degradation of Rab22a-NeoF1 Fusion Protein for Osteosarcoma Lung Metastasis

*Cuiling Zeng, Li Zhong, Wenqiang Liu, Yu Zhang, Xinhao Yu, Xin Wang, Ruhua Zhang, Tiebang Kang\* and Dan Liao\**

Table 1

| Oligonucleotides | Target                  |
|------------------|-------------------------|
| p62-F            | GACTACGACTTGTGTAGCGTC   |
| p62-R            | AGTGTCCGTGTTTCACCTTCC   |
| STBD1-F          | GACCTTGGTAAACTGCAAGCA   |
| STBD1-R          | CCTTTTTGGAATCCCCATTCTCC |
| NDP52-F          | TGAAGGAGGCGCAAGACAAAA   |
| NDP52-R          | CATCTGCTGTTGCTCCAAGGT   |
| C-CBL-F          | TAGGCGAAACCTAACCAAAGT   |
| C-CBL-R          | AGAGTCCACTTGGAAAGATTCT  |
| BNIP3L-F         | TTGGATGCACAACATGAATCAGG |
| BNIP3L-R         | TCTTCTGACTGAGAGCTATGGTC |
| OPTN-F           | CCAAACCTGGACACGTTTACC   |
| OPTN-R           | CCTCAAATCTCCCTTTCATGGC  |
| NBR1-F           | CCAAACCTGGACACGTTTACC   |
| NBR1-R           | CCTCAAATCTCCCTTTCATGGC  |
| GAPDH-F          | ATCACCATCTTCCAGGAGCGA   |
| GAPDH-R          | CCTTCTCCATGGTGGTGAAGAC  |
| PINK1-F          | GCCTCATCGAGGAAAAACAGG   |
| PINK1-R          | GTCTCGTGTCCAACGGGTC     |
| FLT3-F           | CTGAATTGCCAGCCACATTTTG  |
| FLT3-R           | GGAACGCTCTCAGATATGCAG   |
| EGFR-F           | AGGCACGAGTAACAAGCTCAC   |
| EGFR-R           | ATGAGGACATAACCAGCCACC   |
| UBR2-F           | GTACCAGCATTAGCCCACTATG  |
| UBR2-R           | TGCAAGAATATGTAGGCTCTCCT |
| STUB1-F          | AGCAGGGCAATCGTCTGTTC    |
| STUB1-R          | CAAGGCCCGGTTGGTGTAAATA  |
| FBXL12-F         | CACTATGCCCAAGCTCAGAGT   |
| FBXL12-R         | GACGATGACCATACAGTGGGG   |
| TRIM40-F         | ACATCTCTTCTGTGCGAGTGTGC |
| TRIM40-R         | GGCAGATATAGCCTGTCCCTA   |
| USP7-F           | GGAAGCGGGAGATACAGATGA   |
| USP7-R           | AAGGACCGACTCACTCAGTCT   |
| PJA2-F           | TGTTGCAGTACATCACAGTGAG  |
| PJA2-R           | AGCACTACAAGCTCCTGGAATA  |
| ALG13-F          | TTTGACGACCTCATTGCGTGT   |
| ALG13-R          | TAAGTCGGTTGTAACCAAGGC   |
| NIX-F            | ATGTCGTCCCACCTAGTTCGAG  |
| NIX-R            | TGAGGATGGTACGTGTTCCAG   |
| TOLLIP-F         | TGGGCCGACTGAACATCAC     |
| TOLLIP-R         | GTGGATGACCTTATTCCAGCG   |
| TAX1BP1-F        | AAGAAACAGCACAACTTCGAGA  |

| Oligonucleotides | Target                 |
|------------------|------------------------|
| TAX1BP1-R        | TGGATGTAGCATCACTGAACCT |
| FUNDC1-F         | CCTCCCAAGACTATGAAAGTGA |
| FUNDC1-R         | AAACTCGATTCCACCACTG    |
| FAM134B-F        | CTCAGCCACTGTATTGCAGAA  |
| FAM134B-R        | AACAATGGACACAAAATGCACA |
| NCOA4-F          | GCTCAGCAGCTCTACTCGTTA  |
| NCOA4-R          | GGCACACAGAGACTTGATTGG  |
