# Supplementary material for: Targeting the Lysosomal Degradation of Rab22a‐NeoF1 Fusion Protein for Osteosarcoma Lung Metastasis
Source: PubMed Central journal article supplement (PMC9929137; doi:10.1002/advs.202205483), 2022-12-18
Supplement: ADVS-10-2205483-s006.pdf [file ADVS-10-2205483-s006.pdf]

## Supporting Information

for *Adv. Sci.*, DOI 10.1002/adv.202205483

Targeting the Lysosomal Degradation of Rab22a-NeoF1 Fusion Protein for Osteosarcoma Lung Metastasis

*Cuiling Zeng, Li Zhong, Wenqiang Liu, Yu Zhang, Xinhao Yu, Xin Wang, Ruhua Zhang, Tiebang Kang\* and Dan Liao\**

Table 3

| Oligonucleotides    | Target                     |
|---------------------|----------------------------|
| STUB1 Sg1           | CCGTTCCCCAGCTTACAGCC       |
| STUB1 Sg2           | TGGCCGTGTATTACACCAAC       |
| STUB1 Sh1           | CTGTGAAGGCGCACTTCTT        |
| STUB1 Sh2           | AGCGCTGGAACAGCATTGA        |
| SgNDP52             | GGAAGAAGCTCGAGCAGACA       |
| PINK1 Sg1           | CTGGGGCAATGTAGGCATGG       |
| PINK1 Sg2           | GAAATCCGACAACATCCTTG       |
| lentiCRISPR V2-F    | tcttGTGGAAAGGACGAAACACCg   |
| lentiCRISPR V2-R142 | cctagctagcgaattcAAAAAAgcac |
